# Supplementary material for: What Makes a Foreign Language Intelligible? An Examination of the Impact of Musical Ability and Individual Differences on Language Perception and How Intelligible Foreign Languages Appear
Source: MDPI journal article supplement (doi:10.3390/jintelligence11030043), 2023-02-23
Supplement: s1 [file s1]

### Intraclass coefficients

The tables S1 – S6 below show the intraclass correlation coefficients of the intelligibility ratings of the six languages and table S7 the intraclass correlation coefficients for the melodic and rhythmic singing ratings. We used a two- way mixed effects models where people effects were random and measures effects were fixed. For the language performances we had 3-6 raters for the tasks. Two language tasks consisted of nine and two language tasks of eleven syllables in each of the six languages. Sentence 1 and 2 represent the nine syllable samples for the respective languages, while sentence 3 and 4 illustrate the eleven syllable long sentence material. The singing criteria were rated by four singing teachers who evaluated the singing performance for how well the participants sustained the melody and rhythmical structure of the parts of the songs. Singing 1 and 2 represent the ratings for the melody, while singing 3 and 4 illustrates the ratings on the rhythmic criteria (see tables S7). The results of the intraclass correlation coefficients have shown that the ratings were reliable were at least of the accepted statistical value of 0.7 or above.

**Table S1** illustrates the intraclass correlation coefficient of the Russian language ratings.

| RUSSIAN                        | Number of Raters | Intraclass Correlation | <i>F Test with True Value 0</i> |     |     |      |
|--------------------------------|------------------|------------------------|---------------------------------|-----|-----|------|
|                                |                  |                        | Value                           | df1 | df2 | Sig. |
| Average measures of sentence 1 | 3                | .796                   | 7.002                           | 79  | 158 | .000 |
| Average measures of sentence 2 | 3                | .816                   | 6.940                           | 79  | 158 | .000 |
| Average measures of sentence 3 | 3                | .779                   | 6.327                           | 79  | 158 | .000 |
| Average measures of sentence 4 | 3                | .814                   | 6.447                           | 79  | 158 | .000 |

Sentence 1 and 2: nine syllables; sentence 3 and 4: eleven syllables.

**Table S2** illustrates the intraclass correlation coefficient of the Japanese language ratings.

| JAPANESE                       | Number of Raters | Intraclass Correlation | <i>F Test with True Value 0</i> |     |     |      |
|--------------------------------|------------------|------------------------|---------------------------------|-----|-----|------|
|                                |                  |                        | Value                           | df1 | df2 | Sig. |
| Average measures of sentence 1 | 6                | .913                   | 15.739                          | 79  | 395 | .000 |
| Average measures of sentence 2 | 6                | .917                   | 20.384                          | 79  | 395 | .000 |
| Average measures of sentence 3 | 6                | .870                   | 13.332                          | 79  | 395 | .000 |
| Average measures of sentence 4 | 6                | .885                   | 14.808                          | 79  | 395 | .000 |

Sentence 1 and 2: nine syllables; sentence 3 and 4: eleven syllables.

**Table S3** illustrates the intraclass correlation coefficient of the Tagalog language ratings.

| TAGALOG                        | Number of Raters | Intraclass Correlation | <i>F Test with True Value 0</i> |     |     |      |
|--------------------------------|------------------|------------------------|---------------------------------|-----|-----|------|
|                                |                  |                        | Value                           | df1 | df2 | Sig  |
| Average measures of sentence 1 | 4                | .742                   | 4.669                           | 79  | 237 | .000 |
| Average measures of sentence 2 | 4                | .893                   | 12.072                          | 79  | 237 | .000 |
| Average measures of sentence 3 | 4                | .845                   | 7.171                           | 79  | 237 | .000 |
| Average measures of sentence 4 | 4                | .928                   | 14.471                          | 79  | 237 | .000 |

Sentence 1 and 2: nine syllables; sentence 3 and 4: eleven syllables.

**Table S4** illustrates the intraclass correlation coefficient of the Mandarin language ratings.

| MANDARIN                       | Number of Raters | Intraclass Correlation | <i>F Test with True Value 0</i> |     |     |      |
|--------------------------------|------------------|------------------------|---------------------------------|-----|-----|------|
|                                |                  |                        | Value                           | df1 | df2 | Sig  |
| Average measures of sentence 1 | 5                | .754                   | 7.436                           | 79  | 316 | .000 |
| Average measures of sentence 2 | 5                | .699                   | 5.833                           | 79  | 316 | .000 |
| Average measures of sentence 3 | 5                | .723                   | 5.050                           | 79  | 316 | .000 |
| Average measures of sentence 4 | 5                | .734                   | 5.854                           | 79  | 316 | .000 |

Sentence 1 and 2: nine syllables; sentence 3 and 4: eleven syllables.

**Table S5** illustrates the intraclass correlation coefficient of the Farsi language ratings.

| FARSI                          | Number of Raters | Intraclass Correlation | <i>F Test with True Value 0</i> |     |     |      |
|--------------------------------|------------------|------------------------|---------------------------------|-----|-----|------|
|                                |                  |                        | Value                           | df1 | df2 | Sig  |
| Average measures of sentence 1 | 4                | .936                   | 20.764                          | 79  | 237 | .000 |
| Average measures of sentence 2 | 4                | .916                   | 16.818                          | 79  | 237 | .000 |
| Average measures of sentence 3 | 4                | .848                   | 8.956                           | 79  | 237 | .000 |
| Average measures of sentence 4 | 4                | .889                   | 13,507                          | 79  | 237 | .000 |

Sentence 1 and 2: nine syllables; sentence 3 and 4: eleven syllables.

**Table S6** illustrates the intraclass correlation coefficient of the Thai language ratings.

| THAI | Number of Raters | Intraclass Correlation | <i>F Test with True Value 0</i> |     |     |     |
|------|------------------|------------------------|---------------------------------|-----|-----|-----|
|      |                  |                        | Value                           | df1 | df2 | Sig |

|                                |   |      | Value | df1 | df2 | Sig  |
|--------------------------------|---|------|-------|-----|-----|------|
| Average measures of sentence 1 | 5 | .719 | 7.144 | 79  | 316 | .000 |
| Average measures of sentence 2 | 5 | .763 | 5.696 | 79  | 316 | .000 |
| Average measures of sentence 3 | 5 | .727 | 4.798 | 79  | 316 | .000 |
| Average measures of sentence 4 | 5 | .760 | 5.353 | 79  | 316 | .000 |

Sentence 1 and 2: nine syllables; sentence 3 and 4: eleven syllables.

**Table S7** illustrates the intraclass correlation coefficient of the singing ratings.

| SINGING                              | Number of Raters | Intraclass Correlation | <i>F Test with True Value 0</i> |     |     |      |
|--------------------------------------|------------------|------------------------|---------------------------------|-----|-----|------|
|                                      |                  |                        | Value                           | df1 | df2 | Sig  |
| Average measures of singing 1 melody | 4                | .862                   | 9.068                           | 79  | 237 | .000 |
| Average measures of singing 2 melody | 4                | .935                   | 15.475                          | 79  | 237 | .000 |
| Average measures of singing 3 rhythm | 4                | .782                   | 6.087                           | 79  | 237 | .000 |
| Average measures of singing 4 rhythm | 4                | .886                   | 8.999                           | 79  | 237 | .000 |

Singing 1 melody represents intraclass correlation coefficient of the short part of the melodic ratings, while singing 2 melody shows the intraclass correlation coefficient of the longer part of the melodic ratings. Singing 3 rhythm represents the intraclass correlation coefficient of the short part of the rhythmic ratings, while singing 4 rhythm shows the intraclass correlation coefficient of the longer part of the rhythmic ratings.

### Figure S1

The figure below shows the singing tasks of the unfamiliar song. For the first part the participants were introduced to sing “whenever I miss, whenever I miss, I miss your smiling”. The second part of the song was a further extension of the first part and the lyrics were as follows: “whenever I miss, whenever I miss, I miss your smiling, whenever I try, I try to fake a little smile”.

# Whenever I miss

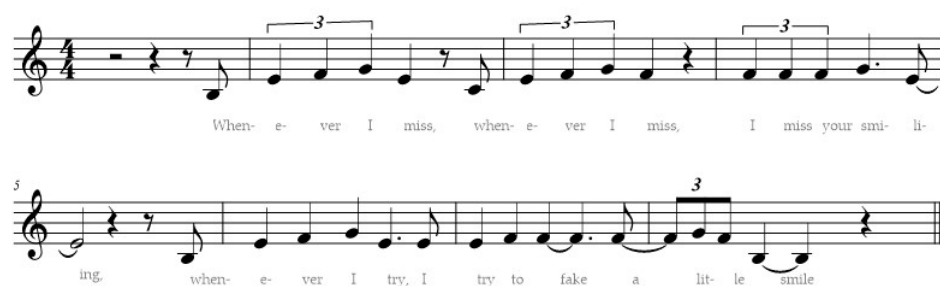

**Figure S1.** Short sequences of the unfamiliar song.

## Correlational analyses

Correlational analyses were applied in order to provide information about the relationship between the variables of interest. The tables S8 and S9 below show the correlations of the familiarity and the pleasant-sounding score and the musical variables under consideration. As outlined, we did not find any correlation between the musical variables familiarity and pleasant-sounding.

**Table S8.** Correlations familiarity.

| Variable    | AMMA tonal aptitude | AMMA rhythmic aptitude | Melodic singing aptitude | Rhythmic singing aptitude |
|-------------|---------------------|------------------------|--------------------------|---------------------------|
| Familiarity | .008                | -.007                  | .192                     | .198                      |

\* $p < .05$  (uncorrected, two-tailed). \*\*  $p < .001$  (uncorrected, two-tailed).

**Table S9.** Correlations pleasant sounding.

| Variable          | AMMA tonal aptitude | AMMA rhythmic aptitude | Melodic singing aptitude | Rhythmic singing aptitude |
|-------------------|---------------------|------------------------|--------------------------|---------------------------|
| Pleasant sounding | .118                | .153                   | -.057                    | -.074                     |

\* $p < .05$  (uncorrected, two-tailed). \*\*  $p < .001$  (uncorrected, two-tailed).
